# Supplementary material for: Cation-controlled diffusion of chloride ions during electrochemical chlorine evolution in acidic media
Source: Research Square preprint supplement (doi:10.21203/rs.3.rs-5786052/v1), 2025-01-17
Supplement: Supplementary file 1 [file f24ddd67d83c0db6b1150f4d.docx]

**Supplementary Information**

**Cation-controlled diffusion of chloride ions during electrochemical chlorine evolution in acidic media**

Taejung Lim,1* Hideshi Ooka,1 and Ryuhei Nakamura1,2*

1Biofunctional Catalyst Research Team, RIKEN Center for Sustainable Resource Science (CSRS), 2-1 Hirosawa, Wako, Saitama 351-0198, Japan.

2Earth-Life Science Institute (ELSI), Institute of Science Tokyo, 2-12-1-I7E Ookayama, Meguro-ku, Tokyo 152-8550, Japan.

*Corresponding authors: TL, taejung.lim@riken.jp; RN, ryuhei.nakamura@riken.jp

**Table of Contents**

**Supplementary Figures……………………………………………………………………….4**

Supplementary Figure S1– Schematic showing an example of hydrodynamic measurements using RRDE………………………………………………………………………………….4

Supplementary Figure S2– Cyclic voltammograms using RRDE at different rpm in electrolytes containing 50 mM HCl or MCl…………………………………………………..5

Supplementary Figure S3– Tafel analyses using cyclic voltammograms.………….………..6

Supplementary Figure S4– Current-dependent Tafel slopes ………...……………………….7

Supplementary Figure S5– Cyclic voltammograms using RRDE at different rpm in blank 0.1 M H2SO4 electrolyte and 0.1 M H2SO4 electrolytes supplemented with 25 mM M2SO4……..8

Supplementary Figure S6– Simulated diffusion-limiting current density using the cation-dependent kinematic viscosity and mutual diffusion coefficients in bulk solution……..…….9

Supplementary Figure S7– Ratio between the kinetic current density of charge transfer and the diffusion-limiting current density at each rpm ………………..….…….…………….....10

Supplementary Figure S8– Levich and *j*lim,HOR*−*1 versus *ω−*1/2 of H2 oxidation reaction on Pt/C coated with controlled Nafion thickness …………………...……………………………….11

Supplementary Figure S9– Levich and *j*lim,HOR*−*1 versus *ω−*1/2 of H2 oxidation reaction on polycrystalline Pt coated with controlled Nafion thickness ………………………………..12

Supplementary Figure S10– Levich and *j*lim,HOR*−*1 versus *ω−*1/2 of H2 oxidation reaction on polycrystalline Pt coated with controlled Nafion thickness ………………….…………….13

Supplementary Figure S11– Chronoamperograms using RRDE by adding M2SO4………...14

Supplementary Figure S12– Normalized chronoamperometric current densities in different concentrations of M+ ……………………………………………………………………….16

Supplementary Figure S13– Levich and *j*CER*−*1 versus *ω−*1/2 plots of chronoamperometric current densities in different concentrations of M+ ……………………….………….…….17

Supplementary Figure S14– Effect of cation mixing *j*f*−*1 …………………………………...18

Supplementary Figure S15– Effect of MCl concentration on *j*f*−*1 …………………………..19

Supplementary Figure S16– Detailedschematic of the layered structure in front of an anode surface during chlorine and oxygen evolution reactions using RRDE ………….………….20

Supplementary Figure S17– Cyclic voltammograms using RRDE and their diffusion analyses in 0.1 M H2SO4 electrolyte supplemented with 25 mM HCl …………….………………….21

Supplementary Figure S18– Diffusion barrier of the cation-dependent layer as a function of the thermodynamic parameters of hydration in standard temperature and pressure ……….22

Supplementary Figure S19– Effect of PEEK or PTFE spacer and shroud on RRDE measurements in 0.1 M H2SO4 electrolyte supplemented with 50 mM LiCl………….…….23

Supplementary Figure S20– Electrodeposition in IrO*x* colloids on GC disk of RRDE ……...24

Supplementary Figure S21– Electrochemical cleaning of the Pt ring and IrO*x*/GC disk of RRDE ………………………………………………………………………………………25

Supplementary Figure S22– Collection efficiency of GC-Pt RRDE measured by [FeIII(CN)6]3−/[FeII(CN)6]4− redox using chronoamperometry ……….…………………….26

Supplementary Figure S23– Detection test of dissolved Ir species on Pt ring of RRDE .….28

Supplementary Figure S24– Cyclic voltammograms of IrO*x*/GC disk before and after CER and OER measurement in 50 mM MCl electrolytes ………………………………….…….29

Supplementary Figure S25– Scanning electron microscopic images of IrO*x*/GC surface in different conditions ………………………………………………………………………...30

Supplementary Figure S26– Energy dispersive X-ray spectra of IrO*x*/GC surface after electrochemical measurements ……………………………………………………………..32

**Supplementary Note……………………………………………………………...….………33**

Supplementary Note S1– Double diffusion model ………………………………..………..33

**Supplementary References……………………………………………………...….……….36**

**Supplementary Figure S1. Schematic showing an example of hydrodynamic measurements using RRDE.** The rotation speed of the electrode (*ω*, rad∙s−1 or 2π/60 rpm) controls the vertical mass transport from the bulk electrolyte to the IrO*x*/GC surface by forming a laminar flow parallel with the electrode surface from the disk centre to the edge of the RRDE. On the IrO*x*/GC disk, applied oxidative potential starts CER and OER to generate a gas mixture of Cl2 and O2. Simultaneously, the Pt ring is held at a ring potential (*E*ring; no *iR*-correction) of 0.95 VRHE, which only reduced Cl2 back to Cl−, enabling to the calculation of partial current densities (*j*CER and *j*OER) and CER selectivity. Collection efficiency (*N*col) was calculated based on the RRDE measurements using the Fe[CN]3−/Fe[CN]4− redox couple (Supplementary Fig. **S21**).

**Supplementary Figure S2. Cyclic voltammograms (CVs) using RRDE at different rpm in electrolytes containing 50 mM HCl or MCl. (a)** LiCl. **(b)** NaCl. **(c)** HCl (absence of M+). **(d)** KCl. **(e)** CsCl. 0.1 M H2SO4 was used as a supporting electrolyte (Ar-saturated, pH 0.90±0.03). CVs were sequentially measured from 3,600 rpm down to 1,225 rpm at *E*ring = 0.95 VRHE and disk scan rate: 0.01 V∙s−1. Solution resistance (*R*sol) was recorded by EIS at OCP (~1.1 VRHE) after CVs measurements. Black vertical lines indicate the potentials where the current densities were collected for diffusion analyses in Fig. **2a,c**. The *ε*CER indicates CER selectivity. All solid and dashed lines indicate *j*CER and *j*OER, respectively. Three independent data sets were normalized for each line.

**Supplementary Figure S3.** **Tafel analyses using cyclic voltammograms. (a)** The comparison of Tafel slopes (*b*) measured at the range of 1−3 mA∙cm−2 in Supplementary Figs. **S3b,c**. **(b)** Tafel slopes of *j*CER and *j*OER in 0.1 M H2SO4 electrolytes supplemented with 50 mM HCl or MCl (Ar-saturated, pH 0.90±0.03) at 3,600 rpm (Supplementary Fig. **S2**). **(c)** Tafel slopes of *j*CER and *j*OER in blank 0.1 M H2SO4 and 0.1 M H2SO4 electrolytes supplemented with 25 mM M2SO4 (Ar-saturated, pH 0.90±0.03) at 3,600 rpm (Supplementary Fig. **S5**). Three independent data sets were normalized for each data point, and the standard error of the mean was calculated.

The Tafel slope was taken from the simplified Tafel equation as *E−iR* = *a* + *b*∙log *j*, where *a* and *j* indicate the Tafel intercept and each current densities, namely *j*CER or *j*OER.

**Supplementary Figure S4. Current-dependent Tafel slopes. (a)** Tafel slope vs. *j*CER in 0.1 M H2SO4 electrolyte supplemented with 50 mM HCl or MCl at 3,600 rpm (Supplementary Fig. **S5**). **(b)** Tafel slope vs. *j*OER in 0.1 M H2SO4 electrolyte supplemented with 50 mM HCl or MCl at 3,600 rpm (Supplementary Fig. **S5**). **(c)** Tafel slope vs. *j*OER in blank 0.1 M H2SO4 or 0.1 M H2SO4 electrolyte supplemented with 25 mM M2SO4 at 3,600 rpm (Supplementary Fig. **S4**). Each data point was normalized in 5 mV of applied potential interval. Three independent data sets were normalized for each point and plot. Upper panels are the magnification of the grey boxes in lower panels for the current density range of 0−6 mA∙cm−2.

Following the previous literature1, the current density of 1−3 mA∙cm−2 exhibits the minimized deviation in Tafel slopes. Since the non-charge-transfer effects from reactant diffusion and attached gas bubbles are minimized, the range refers to the “kinetically meaningful Tafel slope” [1].

**Supplementary Figure S5.** **Cyclic voltammograms (CVs) using RRDE at different rpm in blank 0.1 M H2SO4 electrolyte and 0.1 M H2SO4 electrolytes supplemented with 25 mM M2SO4. (a)** Li2SO4. **(b)** Na2SO4. **(c)** H2SO4 (absence of M+). **(d)** K2SO4. **(e)** Cs2SO4. All electrolytes were adjusted to pH 0.90±0.03 and Ar-saturated. CVs were sequentially measured from 3,600 rpm down to 1,225 rpm at *E*ring = 0.95 VRHE and disk scan rate: 0.01 V∙s−1. Solution resistance (*R*sol) was recorded by EIS at OCP (~1.1 VRHE) after CVs measurements. The *ε*CER indicates CER selectivity that is presumably due to Na3IrCl6 precursors. All solid and dashed lines indicate *j*CER and *j*OER, respectively. Three independent data sets were normalized for each line.

**Supplementary Figure S6. Simulated diffusion-limiting current density (*j*lim) using the cation-dependent kinematic viscosity (*ν*) and mutual diffusion coefficients (*D*MCl) in bulk solution. (a)** Kinematic viscosity of aqueous MCl solutions at 20 °C as a function of MCl concentration. The values were calculated from the solution viscosity (*η*, ×10−2 g∙cm−1∙s−1) and density (*ρ*, g∙cm−3) following the equation2, *ν = η*/*ρ*. **(b)** The simulated Levich plot (*j*lim,*ν*-MCl vs. *ω*1/2) using the values of kinematic viscosity in Supplementary Fig. **S6a**. The inset shows *j*lim,*ν*-MCl at 3,600 rpm, or *ω*1/2 = 19.4 rad∙s−1. The kinematic viscosity of 0.102 M H2SO4 at 20 °C (1.014×10−2 cm2∙s−1) was used for calculation. The dashed lines indicate linear regression. **(c)** The mutual diffusion coefficient of bulk MCl solution (*D*MCl) measured by Rayleigh interferometry3-8 as a function of concentration. The dashed lines refer to quadratic regression (*y* = a∙*x*2 + b∙*x* + c). **(d)** The simulated Levich plot (*j*lim,*D*-MCl vs. *ω*1/2) using *D*MCl values in Supplementary Fig. **S6c**. The Cl− diffusion coefficient in infinite dilution (*D*Cl, 2.032×10−5 cm2∙s−1) was used for calculation. The dashed lines in Supplementary Fig. **S6a,b,d** indicate linear regression.

**Supplementary Figure S7. Ratio between the kinetic current density of charge transfer (*j*K) and the diffusion-limiting current density (*j*lim) at each rpm.** The values of *j*K were given by assuming the Koutecký−Levich intercept as the charge-transfer artifact. The parentheses in legends indicate the *iR*-corrected potentials from which the current densities were collected in Supplementary Fig. **S2**. Three independent data sets were normalized for each bar.

**Supplementary Figure S8. Levich (*j*lim,HOR versus *ω*1/2) and *j*lim,HOR*−*1 versus *ω−*1/2 of H2 oxidation reaction (HOR) on Pt/C coated with controlled Nafion thickness (*L*f). (a)** Levich plot of the diffusion-limiting current density of HOR (*j*lim,HOR) as a function of *ω*1/2. The dashed lines indicate linear regression. **(b)** *j*lim*−*1 versus *ω−*1/2 plots. The dashed lines indicate linear regression. The data points were previously measured and reported by Schmidt et al.9 **(c)** Intercepts of *j*lim,HOR*−*1 versus *ω−*1/2 plots (*j*f,HOR*−*1, Supplementary Fig. **S8b**) plotted as a function of *L*f. The dashed lines indicate linear regression. **(d)** Different diffusion coefficients, *D*-HOR and *D*conv-HOR, as a function of *L*f were calculated from the Levich slopes (Supplementary Fig. **S8a**) and slopes of *j*lim,HOR*−*1 versus *ω−*1/2 plots (Supplementary Fig. **S8b**), respectively.

**Supplementary Figure S9.** **Levich (*j*lim,HOR versus *ω*1/2) and *j*lim,HOR*−*1 versus *ω−*1/2 plots of H2 oxidation reaction (HOR) on polycrystalline Pt coated with controlled Nafion thickness (*L*f). (a)** Levich plot of the diffusion-limiting current density of HOR (*j*lim,HOR) as a function of *ω*1/2. The dashed lines indicate linear regression. **(b)** *j*lim,HOR*−*1 versus *ω−*1/2 plots. The dashed lines indicate linear regression. The experimental data points were previously measured and reported by Watanabe et al.10 **(c)** Intercepts of *j*lim,HOR*−*1 versus *ω−*1/2 plots (*j*f,HOR*−*1, Supplementary Fig. **S9b**) plotted as a function of *L*f. The dashed lines indicate linear regression. **(d)** Different diffusion coefficients, *D*-HOR and *D*conv-HOR, as a function of *L*f were calculated from the Levich slopes (Supplementary Fig. **S9a**) and slopes of *j*lim,HOR*−*1 versus *ω−*1/2 plots (Supplementary Fig. **S9b**), respectively.

**Supplementary Figure S10. Levich (*j*lim,ORR versus *ω*1/2) and *j*lim,ORR*−*1 versus *ω−*1/2 plots of O2 reduction reaction (ORR) on polycrystalline Pt coated with controlled Nafion thickness (*L*f). (a)** Levich plot of the diffusion-limiting current density of ORR (*j*lim,ORR) as a function of *ω*1/2. The dashed lines indicate linear regression. **(b)** *j*lim,ORR*−*1 versus *ω−*1/2 plots. The dashed lines indicate linear regression. The experimental data points were previously measured and reported by Watanabe et al.10 **(c)** Intercepts of *j*lim,ORR*−*1 versus *ω−*1/2 plots (*j*f,ORR*−*1, Supplementary Fig. **S10b**) plotted as a function of *L*f. The dashed lines indicate linear regression. **(d)** Different diffusion coefficients, *D*-ORR and *D*conv-ORR, as a function of *L*f were calculated from the Levich slopes (Supplementary Fig. **S10a**) and slopes of *j*lim,ORR*−*1 versus *ω−*1/2 plots (Supplementary Fig. **S10b**), respectively.

**Supplementary Figure S11. Chronoamperograms (CAs) using RRDE by adding M2SO4.** **(a)** CAs measured from 3,600 rpm down to 1,225 rpm at *E*disk =2.1 VRHE and *E*ring = 0.95 VRHE (no *iR*-correction) in 0.1 M H2SO4 electrolyte supplemented with 25 mM LiCl, and after adding each 25 mM and 50 mM Li2SO4. **(b)** CAs measured from 3,600 rpm down to 1,225 rpm at *E*disk =2.1 VRHE and *E*ring = 0.95 VRHE (no *iR*-correction) in 0.1 M H2SO4 electrolyte supplemented with 25 mM NaCl, and after adding each 25 mM and 50 mM Na2SO4. **(c)** CAs measured from 3,600 rpm down to 1,225 rpm at *E*disk =2.1 VRHE and *E*ring = 0.95 VRHE (no *iR*-correction) in 0.1 M H2SO4 electrolyte supplemented with 25 mM KCl, and after adding each 25 mM and 50 mM K2SO4. **(d)** CAs measured from 3,600 rpm down to 1,225 rpm at *E*disk =2.1 VRHE and *E*ring = 0.95 VRHE (no *iR*-correction) in 0.1 M H2SO4 electrolyte supplemented with 25 mM CsCl, and after adding each 25 mM and 50 mM Cs2SO4. All initial electrolytes were adjusted to pH 0.90±0.03 and Ar-saturated during measurements. Each 15 s of CA was conducted for each electrode rpm. Three independent data sets were normalized for each plot.

**Supplementary Figure S12. Normalized chronoamperometric (CA) current densities in different concentrations of M+. (a)** Li+. **(b)** Na+. **(c)** K+. **(d)** Cs+. The last half (~7.5 s) CA current densities of each different condition were normalized and displayed here. Solution resistance (*R*sol) was recorded by EIS at OCP (~1.1 VRHE) after the CAs measurements for each electrolyte condition. Three independent data sets in Supplementary Fig. S13 were normalized for each data point, and the standard error of the mean was calculated.

**Supplementary Figure S13. Levich (*j*CER versus *ω*1/2) and *j*CER*−*1 versus *ω−*1/2 plots of chronoamperometric (CA) current densities in different concentrations of M+ measured. (a)** Levich plot of initial 25 mM MCl. **(b)** Levich plot of 25 mM MCl + 25 mM M2SO4. **(c)** Levich plot of 25 mM MCl + 50 mM M2SO4. **(d)** *j*CER*−*1 versus *ω−*1/2 plots of electrolyte containing 25 mM MCl. **(e)** *j*CER*−*1 versus *ω−*1/2 plots of electrolyte containing 25 mM MCl and 25 mM M2SO4. **(f)** *j*CER*−*1 versus *ω−*1/2 plots of electrolyte containing 25 mM MCl and 50 mM M2SO4. All dashed lines indicate linear regression. Three independent data sets in Supplementary Fig. S13 were normalized for each data point, and the standard error of the mean was calculated..

**Supplementary Figure S14. Effect of cation mixing on the intercepts** **of *j*lim*−*1 versus *ω−*1/2 plots (*j*f*−*1).** **(a)** Intercepts of *j*lim*−*1 versus *ω−*1/2 plots (*j*f*−*1) calculated using the normalized current densities in Supplementary Fig. **S14c**. **(b)** *j*f*−*1 calculated using the normalized current densities in Supplementary Fig. **S14d**. The normalization of CA current densities was calculated using the last-half current densities in each CA measurement (7.5 s). **(c)** CAs sequentially measured in 0.1 M H2SO4 electrolyte supplemented with 25 mM LiCl (Ar-saturated, pH 0.90±0.03), and after adding each 25 mM Cs2SO4 and Li2SO4. **(d)** CAs sequentially measured in 0.1 M H2SO4 electrolyte supplemented with 25 mM CsCl (Ar-saturated, pH 0.90±0.03), and after adding each 25 mM Li2SO4 and Cs2SO4. Each 15 s of CA was applied for each electrode rpm.

**Supplementary Figure S15. Effect of MCl concentration on the intercepts** **of *j*lim *−*1 versus *ω−*1/2 plots (*j*f*−*1).** The values of*j*f−1 measured in Ar-saturated 0.1 M H2SO4 electrolytes supplemented with 25 mM and 50 mM MCl were obtained from CA (Fig. **2d**) and CV (Fig. **3a**), respectively. The values of*j*f−1 measured in Ar-saturated 0.1 M H2SO4 electrolytes supplemented with 25 mM HCl were obtained from CV (Supplementary Fig. **S17**). Three independent data sets were normalized for each data point, and the standard error of the mean was calculated.

The slope of linear regression (dashed line) was 1.801, indicating that the halved bulk concentration of MCl exhibited the halved*j*f−1 as expected in the double diffusion model (see Supplementary Note **S1**).

**Supplementary Figure S16. Detailed schematic of the layered structure in front of an anode surface during chlorine and oxygen evolution reactions using RRDE.** No specific cation species and concentrations were designated here. The electrical double layer (EDL) consisted of a Helmholtz double layer and a diffuse layer11,12. The thickness of diffusion layers was noted based on **Table 1**. Red arrows (*J*M+ and *J*Cl−) indicate the flux direction of cations and chloride ions, respectively.

We omitted displaying the EDL in Fig. **4a,b** to focus on the cation effect on diffusion layers, as the influence of cations on the CER and OER charge transfers was negligible (Supplementary Fig. **S3**) and the thickness of EDL was sufficiently lower than the diffusion layers. The specific adsorption of anions is considered to illustrate the EDL based on the specific adsorption of cations at cathodic potentials13. However, no specifically adsorbed Cl− and H2O expected at the electrode surface due to the intensive CER and OER.

**Supplementary Figure S17. CER selectivity, *j*CER, and *j*OER measured by cyclic voltammograms (CVs) using RRDE and their diffusion analyses in 0.1 M H2SO4 electrolyte supplemented with 25 mM HCl.** **(a)** CER selectivity (upper panel), *j*CER (solid lines in lower panel), and *j*OER (dashed lines in lower panel) measured by CVs using RRDE at different rpm. CVs were measured at *E*ring = 0.95 VRHE and 0.01 V∙s−1 of disk scan rate. The electrolyte was adjusted to pH 0.90±0.03 and Ar-saturated. **(b)** Levich plot of *j*lim versus *ω*1/2. Solid and dashed lines indicate *j*CER and *j*OER, respectively. **(c)** *j*lim vs. *ω*1/2 plots. **(d)** *j*lim−1 vs. *ω*−1/2 plots. Dashed lines in Supplementary Fig. **S17c,d** indicate linear regression. Three independent data sets were normalized for each data point, and the standard error of the mean was calculated.

**Supplementary Figure S18. Diffusion barrier of the cation-dependent layer (*α, L*f/*D*f) as a function of the thermodynamic parameters of hydration in standard temperature and pressure. (a)** The values of *L*f/*D*f vs. the molar entropies of hydration (Δhyd*S*°) obtained from the literature14. The dashed line indicates linear regression for alkali metal cations (*R*2 = 0.982). **(b)** The values of *L*f/*D*f vs. the molar Gibbs free energy of hydration of ions (Δhyd*G*°) from the literature15. The dashed line indicates linear regression for alkali metal cations (*R*2 = 0.953).

**Supplementary Figure S19. Effect of PEEK or PTFE spacer and shroud on RRDE measurements in 0.1 M H2SO4 electrolyte supplemented with 50 mM LiCl. (a)** *j*disk, **(b)** *j*ring measured at *E*ring = 0.95 VRHE, and **(c)** *j*CER and *j*OER current densities of IrO*x*/GC with PEEK-bodied RRDE, respectively. **(d)** *j*disk, **(e)** *j*ring measured at *E*ring = 0.95 VRHE, **(f)** *j*CER and *j*OER current densities of IrO*x*/GC with PTFE-bodied RRDE, respectively. All CVs were measured in Ar-saturated electrolytes and 0.01 V∙s−1 of disk scan rate.

A strong hydrophobicity of PTFE spacer led the gas bubble to be lodged on the disk and disk-PTFE spacer boundary (see Supplementary Fig. **S1**), resulting in a significant noise in *j*ring. Accordingly, the noise in *j*ring increased at lower rotation speeds. Vos and Koper previously reported this phenomenon16, which was more intensive than our measurements due to a 4 times thicker PTFE spacer (Δ*r* = 1.00 mm) than that of this study (Δ*r* = 0.25 mm). Overall, *j*disk was also lower than those of the PEEK electrode, probably due to the decreased electrochemical surface area of the disk covered by lodged bubbles.

**Supplementary Figure S20. Electrodeposition in IrO*x* colloids on GC disk of RRDE. (a)** 10 cyclic voltammograms (CVs) of GC disk measured in IrO*x* colloidal solutions (aerated, pH ~1.55). The potential range of 0.16−1.36 VAg/AgCl (scan rate: 0.25 V∙s−1) at 600 rpm was scanned to identify the deposition potential. Increased currents of Ir(III/IV) and Ir(IV/V) redox peaks indicate that the electrodeposition of IrO*x* colloids occurred during CVs, corresponding to increased CER and OER current around 1.3 VAg/AgCl. **(b)** The electrodeposition of IrO*x* using chronoamperometry (CA) was conducted in IrO*x* colloidal solutions (aerated, pH ~1.55) at 1.26 VAg/AgCl for 300 s at 600 rpm. The applied potential was identical to the potential of CV at 0.8 mA (Supplementary Fig. **S20a**). Before CA, open circuit potential was applied for 10 s.

**Supplementary Figure S21. Electrochemical cleaning of the Pt ring and IrO*x*/GC disk of RRDE. (a)** Cyclic voltammograms (CVs) of Pt ring for removal of electrodeposited IrO*x* in the potential range of 1.3−2.2 VRHE (scan rate: 0.5 V∙s−1) at 3,600 rpm, while the number of CVs differs electrode by electrode. Typically, 40−80 CVs were needed to completely remove IrO*x*. **(b)** 40 CVs of Pt ring in the potential range of −0.1−1.7 VRHE (scan rate: 0.5 V s−1) at 3,600 rpm, measured after IrO*x* removal cycling. **(c)** A CV of Pt ring measured in the potential range of 0.05−1.4 VRHE (scan rate: 0.01 V∙s−1) without electrode rotation. The electrochemical characteristic peaks of poly Pt were shown in 0.1−0.25 VRHE (hydrogen underpotential deposition), 0.8 VRHE (poly Pt reduction), and 0.8−1.3 VRHE (poly Pt oxidation). The absence of IrO*x* redox peaks at 0.9 VRHE indicated the complete removal of IrO*x* on poly Pt by electrochemical cleaning. **(d)** CVs of IrO*x* disk in the potential range of 0.3−1.5 VRHE (scan rate: 0.01 V∙s−1) without electrode rotation, measured before and after the 40 CVs of electrochemical cleaning in the potential range of 1.3–1.6 VRHE (scan rate: 0.5 V∙s−1).

**Supplementary Figure S22. Collection efficiency (*N*col) of GC-Pt RRDE measured by [FeIII(CN)6]3−/[FeII(CN)6]4− redox using chronoamperometry (CA).** **(a)** Normalized *N*col at different electrode rotation speeds obtained from Supplementary Fig. **S22c−f**. The dashed line indicates the theoretical *N*col provided by the manufacturer. **(b)** [FeIII(CN)6]3−/[FeII(CN)6]4− redox peak on the GC disk of RRDE in 10 mM K3Fe[CN]6 electrolytes supplemented with different 0.1 M MCl measured in the potential range of −0.4−0.8 VAg/AgCl (scan rate: 0.1 V∙s−1) without electrode rotation **(c−f)** CAs measured at *E*disk = −0.3 VAg/AgCl and *E*ring = 0.5 VAg/AgCl for 60 s in 10 mM K3Fe[CN]6 electrolytes supplemented with **(c)** 0.1 M LiCl, **(d)** 0.1 M NaCl, **(e)** 0.1 M KCl, and **(f)** 0.1 M CsCl. Background currents of disk and ring were calibrated by subtracting the currents of CAs measured at each *E*disk and *E*ring = 0.5 VAg/AgCl. Four independent data sets were normalized for each point, plot, and standard error of the mean, except for Supplementary Fig. **S22b**.

**Supplementary Figure S23. Detection test of dissolved Ir species on Pt ring of RRDE. (a)** Latimer diagram of iridium17. **(b)** Cyclic voltammogram of GC-Pt RRDE measured at 3,600 rpm in the H2SO4 electrolyte supplemented with each 1 mM of Na3IrIIICl6 and Na2IrIVCl6 (pH 0.88), which were excessive concentrations when considering electrochemically dissolved Ir species during acidic OER18. *E*disk and *E*ring were scanned in the same potential scheme of Fig. **1** (*iR*-uncorrected *E*disk = 1.2–2.2 VRHE, scan rate: 0.01 V∙s−1, and constant *E*ring = 0.95 VRHE).

Zhang et al. previously reported that the oxidative potential cycling led to the electrochemical dissolution of Ir perovskites into [IrIV(OH)6]2− or [IrIV(OH)2(ClO4)4]2− in a chloride-free 0.1 M HClO4 electrolyte19. However, due to the presence of Cl− in this study, IrO*x*/GC disk were expected to generate [IrIIICl6]3− and/or [IrIVCl6]2− as a dissolved species. Although each 1 mM of [IrIIICl6]3− and [IrIVCl6]2− was present, the measured *j*ring (−1 mA∙cm−2) was sufficiently low, as only 8.3% and 5.1% of the theoretical diffusion-limiting ring current densities were obtained by assuming 100% reduction occurred on the ring in the presence of 1 mM [IrIIICl6]3− (−12.0 mA∙cm−2) and 1 mM [IrIVCl6]2− (−19.8 mA∙cm−2), respectively. The theoretical diffusion-limiting current densities of the ring were calculated using *N*col measured in NaCl electrolyte at 3,600 rpm (0.4797). The diffusion coefficients of [IrIIICl6]3− (6.10×10−6 cm2∙s−1) and [IrIVCl6]2− (8.38×10−6 cm2∙s−1) in acidic media (pH 4) were obtained from the previous literature20. The kinematic viscosity of 0.102 M H2SO4 at 20 °C (1.014×10−2 cm2∙s−1) was used.

**Supplementary Figure S24. Cyclic voltammograms of IrO*x*/GC disk before and after CER and OER measurement in 50 mM MCl electrolytes. (a)** LiCl. **(b)** NaCl. **(c)** HCl (absence of M+). **(d)** KCl. **(e)** CsCl. The measurements were conducted in the potential range of 0.3−1.55 VRHE (scan rate: 0.01 V s−1) at 3,600 rpm.

**Supplementary Figure S25. Scanning electron microscopic (SEM) images of IrO*x*/GC surface in different conditions. (a**,**b)** As-prepared IrO*x*/GC surface. **(c**,**d)** IrO*x*/GC surface after electrochemical cleaning in Ar-saturated 0.1 M H2SO4 electrolyte (pH 0.90±0.03). **(e**,**f)** IrO*x*/GC surface after measuring CER and OER in Ar-saturated 0.1 M H2SO4 electrolyte supplemented with 50 mM LiCl (pH 0.90±0.03). **(g**,**h)** IrO*x*/GC surface after measuring CER and OER in Ar-saturated 0.1 M H2SO4 electrolyte supplemented with 50 mM CsCl (pH 0.90±0.03).

**Supplementary Figure S26. Energy dispersive X-ray (EDX) spectra of IrO*x*/GC surface after electrochemical measurements. (a)** EDX spectrum of IrO*x*/GC surface after electrochemical cleaning in Ar-saturated 0.1 M H2SO4 electrolyte (pH 0.90±0.03). **(b)** EDX spectrum of IrO*x*/GC surface after measuring CER and OER in Ar-saturated 0.1 M H2SO4 electrolyte supplemented with 50 mM LiCl (pH 0.90±0.03). **(c)** EDX spectrum of IrO*x*/GC surface after measuring CER and OER in Ar-saturated 0.1 M H2SO4 electrolyte supplemented with 50 mM CsCl (pH 0.90±0.03). EDX spectra was obtained within a colored box in SEM images.

**Supplementary Note S1. Double diffusion model.**

The positive intercepts (*j*f−1; Fig. **2d**) were not due to a charge-transfer limitation, because increasing the overpotential did not increase the CER current density (*j*CER) on the plateau of CVs (Fig. **1b**). Therefore, as explained in the main text, we hypothesized the existence of an additional, cation-dependent diffusion layer that hindered the transport of Cl− from the bulk electrolyte to the electrode surface. The electrical double layer was not considered in this model.

We assign the additional and conventional layers as the first and second layers in the order of proximity to the electrode surface, respectively (Fig. **4a,b**). Following Fick’s second law, the model is suggested with equal fluxes through every plane boundary parallel to the electrode surface. As electrochemical diffusion in this study was measured under steady-state conditions, the Cl− consumption rate at the electrode surface (*x* = 0) must match:

(1)

where *n*, *k* and *C*0 indicate the number of electrons transferred for CER (*n* = 2), the rate constant of charge transfer, and the Cl− concentration at the electrode surface (*x* = 0), respectively. The number in parameters is denoted as the order of diffusion layers. The fluxes at the electrode surface (*x* = 0) and the first boundary (*x* = *L*1) must also match:

(2)

The linear approximation of continuous concentration gradient was also discretized at the boundaries to yield

(3)

where *L*2 was modeled based on the thickness of the conventional diffusion layer (*δ* = 1.61∙*D*21/3∙*ν*1/6∙*ω−*1/2) in the Levich theory. In this model, *L*1 (below <0.2% of *L*2; **Table 1** in the manuscript) must be sufficiently lower than *L*2 to be completely separated from the effect of electrode rotation, due to *x*(*δ*) = *L*1 + *L*2. This gives:

(4)

and

(5)

Therefore, *C*0 and *C*1 are expressed in terms of bulk reactant concentration (*C*2) as:

(6)

(7)

Now, let us define the following current densities within each layer as:

(8)

(9)

(10)

(11)

These yield:

(12)

(13)

and

(14)

This equation is of the same mathematical form as the conventional Koutecký−Levich (KL) equation. However, *j*L1 and *j*K1 are not the standard diffusion-limiting current densities (*j*lim) and charge-transfer-limiting current densities (*j*K), respectively, because they are dependent on *C*1, not *C*2. Therefore, let us convert equation (14) into the conventional KL equation form using the limiting current densities. First, the diffusion-limiting current densities can be obtained by assuming that electron transfer is sufficiently faster than mass transport (*k* → ∞), giving:

(15)

and

(16)

This yields:

(17)

By considering that:

(18)

Thus, the KL equation of the additional layer is:

(19)

To match the notations with the manuscript hereafter, equation (19) is converted to:

(20)

At infinite rotation speeds (*ω* → *∞*), *δ* → 0 and *C*f → *C*bulk (Fig. **4a**). This gives the intercept of the KL plot (for any electrochemical potential) as:

(21)

where

(22)

Therefore, when the overpotential is sufficiently large (*k* → 0), *j*K → 0 gives:

(23)

We find that equation (23) is identical to the equation for the electrodes modified with semi-permeable polymer films21, as the continuous Cl− concentration gradient across the diffusion layers was applied to this model. In this condition, *δ* is so thin and *k* is so fast that the CER current densities [*j*CER (*ω*,*k* → *∞*)] is solely governed by Cl− diffusing through the cation-dependent diffusion layer. The CV curve in Fig. **4c** was simulated by modeling the rate constant to follow Butler-Volmer kinetics:

(24)

Parameters (*k*0, *α*CER, and *E*eq) were chosen to reproduce the experimental CVs (Fig. **1c**).

**References**

1. van der Heijden, O., Park, S., Eggebeen, J. J. J. & Koper, M. T. M. Non-kinetic effects convolute activity and Tafel analysis for the alkaline oxygen evolution reaction on NiFeOOH electrocatalysts. *Angew. Chem. Int. Ed.* **62**, e202216477 (2023).

2. *CRC handbook of chemistry and physics*. 97th ed, (CRC Press, 2013).

3. Rard, J. A. & Miller, D. G. The mutual diffusion coefficients of NaCl−H2O and CaCl2−H2O at 25°C from Rayleigh interferometry. *J. Sol. Chem.* **8**, 701–716 (1979).

4. Rard, J. A. & Miller, D. G. Mutual diffusion coefficients of barium chloride-water and potassium chloride-water at 25 .degree. from Rayleigh interferometry. *J. Chem. Eng. Data* **25**, 211–215 (1980).

5. Rard, J. A. & Miller, D. G. Mutual diffusion coefficients of SrCl2–H2O and CsCl—H2O at 25 °C from Rayleigh interferometry. *J. Chem. Soc., Faraday Trans. 1* **78**, 887–896 (1982).

6. Rard, J. A. & Miller, D. G. Mutual diffusion coefficients of Nal-H2O and LiCl-H2O at 25°C from Rayleigh interferometry. *J. Sol. Chem.* **12**, 413–425 (1983).

7. Rizzo, P., Albright, J. G. & Miller, D. G. Measurements of interdiffusion coefficients and densities for the system HCl + H2O at 25 °C. *J. Chem. Eng. Data* **42**, 623–630 (1997).

8. Ruanhui, L. & Leaist, D. G. Mutual diffusion in solutions of alkali metal halides Aqueous LiF, NaF and KF at 25°C. *J. Chem. Soc., Faraday Trans.* **94**, 111–114 (1998).

9. Schmidt, T. J. *et al.* Characterization of high-surface-area electrocatalysts using a rotating disk electrode configuration. *J. Electrochem. Soc.* **145**, 2354–2358 (1998).

10. Watanabe, M., Igarashi, H. & Yosioka, K. An experimental prediction of the preparation condition of Nafion-coated catalyst layers for PEFCs. *Electrochim. Acta* **40**, 239–334 (1995).

11. Gebbie, M. A., Liu, B., Guo, W., Anderson, S. R. & Johnstone, S. G. Linking electric double Layer formation to electrocatalytic activity. *ACS Catal.* **13**, 16222–16239 (2023).

12. Bohra, D., Chaudhry, J. H., Burdyny, T., Pidko, E. A. & Smith, W. A. Modeling the electrical double layer to understand the reaction environment in a CO2 electrocatalytic system. *Energy Environ. Sci.* **12**, 3380–3389 (2019).

13. Ovalle, V. J., Hsu, Y.-S., Agrawal, N., Janik, M. J. & Waegele, M. M. Correlating hydration free energy and specific adsorption of alkali metal cations during CO2 electroreduction on Au. *Nat. Catal.* **5**, 624–632 (2022).

14. Marcus, Y. The hydration entropies of ions and their effects on the structure of water. *J. Chem. Soc., Faraday Trans. 1* **82**, 233–242 (1986).

15. Marcus, Y. Thermodynamics of solvation of ions. Part 5.—Gibbs free energy of hydration at 298.15 K. *J. Chem. Soc., Faraday Trans.* **87**, 2995–2999 (1991).

16. Vos, J. G. & Koper, M. T. M. Examination and prevention of ring collection failure during gas-evolving reactions on a rotating ring-disk electrode. *J. Electroanal. Chem.* **850**, 113363 (2019).

17. Bard, A. J., Parsons, R. & Jordan, J. *Standard potentials in aqueous solution*. (International Union of Pure and Applied Chemistry, 1985).

18. Geiger, S. *et al.* The stability number as a metric for electrocatalyst stability benchmarking. *Nat. Catal.* **1**, 508–515 (2018).

19. Zhang, R. *et al.* A dissolution/precipitation equilibrium on the surface of iridium-based perovskites controls their activity as oxygen evolution reaction catalysts in acidic media. *Angew. Chem. Int. Ed.* **58**, 4571–4575 (2019).

20. Weusten, S. J. C., de Groot, M. T. & van der Schaaf, J. A comparative study of the stability of hexachloroiridate and hexacyanoferrate in electrochemical mass transfer measurements. *J. Electroanal. Chem.* **878**, 114512 (2020).

21. Knoche, K. L., Hettige, C., Zook-Gerdau, L. A. & Leddy, J. Film permeation by rotating disk voltammetry at electrodes modified with electrochemically inert layers and heterogeneous composites. *J. Electrochem. Soc.* **163**, H3173–H3181 (2016).
